# Supplementary material for: Long COVID: Association of Functional Autoantibodies against G-Protein-Coupled Receptors with an Impaired Retinal Microcirculation
Source: MDPI journal article supplement (doi:10.3390/ijms23137209), 2022-06-29
Supplement: s1 [file s1]

**Supplementary material:**

Supplementary Table S1 : **Estimations of the age variables (standard error, lower and upper confidence limits, CL) for all the GPCR-AAb on Vessel Density of SVP, ICP, DCP and peripapillary region.** SVP - superficial vascular plexus, ICP - intermediate capillary plexus, DCP - deep capillary plexus. The estimates are represented as the differences between the seronegativity estimate and the seropositivity estimate.

Table S1:

| Solution for fixed effects age |                |          |      |         |                  |          |          |
|--------------------------------|----------------|----------|------|---------|------------------|----------|----------|
|                                |                | Estimate | SE   | t Value | Pr >  t          | Lower CL | Upper CL |
| <b>SVP</b>                     | Noci-AAb       | -0.04    | 0.02 | -2.17   | <b>0.0330</b>    | -0.07    | 0.00     |
|                                | $\beta$ 2-AAb  | -0.04    | 0.02 | -2.66   | <b>0.0095</b>    | -0.08    | -0.01    |
|                                | AT1-AAb        | -0.07    | 0.02 | -3.32   | <b>0.0014</b>    | -0.12    | -0.03    |
|                                | $\alpha$ 1-AAb | -0.07    | 0.02 | -3.26   | <b>0.0017</b>    | -0.11    | -0.03    |
|                                | MAS-AAb        | -0.04    | 0.02 | -2.53   | <b>0.0135</b>    | -0.08    | -0.01    |
|                                | M2-AAb         | -0.05    | 0.02 | -2.71   | <b>0.0082</b>    | -0.08    | -0.01    |
|                                | ETA-AAb        | -0.04    | 0.02 | -2.46   | <b>0.0160</b>    | -0.07    | -0.01    |
| <b>ICP</b>                     | Noci-AAb       | -0.05    | 0.02 | -2.94   | <b>0.0043</b>    | -0.08    | -0.02    |
|                                | $\beta$ 2-AAb  | -0.07    | 0.01 | -10.09  | <b>&lt;.0001</b> | -0.08    | -0.05    |
|                                | AT1-AAb        | -0.05    | 0.02 | -3.18   | <b>0.0021</b>    | -0.08    | -0.02    |
|                                | $\alpha$ 1-AAb | -0.05    | 0.02 | -2.97   | <b>0.0039</b>    | -0.08    | -0.02    |
|                                | MAS-AAb        | -0.05    | 0.02 | -3.19   | <b>0.0021</b>    | -0.08    | -0.02    |
|                                | M2-AAb         | -0.05    | 0.02 | -3.22   | <b>0.0019</b>    | -0.08    | -0.02    |
|                                | ETA-AAb        | -0.05    | 0.02 | -3.15   | <b>0.0023</b>    | -0.08    | -0.02    |
| <b>DCP</b>                     | Noci-AAb       | -0.03    | 0.02 | -1.54   | 0.1281           | -0.06    | 0.01     |
|                                | $\beta$ 2-AAb  | -0.03    | 0.02 | -1.69   | 0.0955           | -0.07    | 0.01     |
|                                | AT1-AAb        | -0.02    | 0.02 | -1.27   | 0.2095           | -0.06    | 0.01     |
|                                | $\alpha$ 1-AAb | -0.05    | 0.02 | -2.03   | <b>0.0452</b>    | -0.09    | 0.00     |
|                                | MAS-AAb        | -0.02    | 0.02 | -1.28   | 0.2046           | -0.05    | 0.01     |
|                                | M2-AAb         | -0.03    | 0.02 | -1.81   | 0.0734           | -0.07    | 0.00     |
|                                | ETA-AAb        | -0.03    | 0.02 | -1.72   | 0.0897           | -0.07    | 0.00     |
| <b>Peripapillary region</b>    | Noci-AAb       | -0.08    | 0.03 | -2.41   | <b>0.0183</b>    | -0.15    | -0.01    |
|                                | $\beta$ 2-AAb  | -0.86    | 2.39 | -0.36   | 0.7205           | -5.62    | 3.90     |
|                                | AT1-AAb        | 1.40     | 2.38 | 0.59    | 0.5585           | -3.35    | 6.15     |
|                                | $\alpha$ 1-AAb | -0.06    | 0.03 | -1.88   | 0.0638           | -0.13    | 0.00     |
|                                | MAS-AAb        | -0.07    | 0.03 | -2.12   | <b>0.0375</b>    | -0.14    | 0.00     |
|                                | M2-AAb         | -0.07    | 0.03 | -2.17   | <b>0.0335</b>    | -0.14    | -0.01    |
|                                | ETA-AAb        | -0.08    | 0.03 | -2.25   | <b>0.0273</b>    | -0.14    | -0.01    |

Supplementary Table S2: **All the significant differences of the least square means (LS means) of sectorial vessel density (VD) of SVP, ICP, DCP and peripapillary region for**

**the significant GPCR-AAb when the interaction term was introduced in the mixed model.** The p-values of the multiple comparisons are adjusted after Tukey-Kramer Test. SVP - superficial vascular plexus, ICP - intermediate capillary plexus, DCP - deep capillary plexus.

Table S2:

| Differences of Least Squares Means (Sector*M2-AAb) for SVP** |          |         |          |          |          |      |         |         |        |       |       |           |           |
|--------------------------------------------------------------|----------|---------|----------|----------|----------|------|---------|---------|--------|-------|-------|-----------|-----------|
| Effect                                                       | Sector   | M2-AAb* | _Sector  | _M2-AAb* | Estimate | SE   | t Value | Pr >  t | Adj P  | Lower | Upper | Adj Lower | Adj Upper |
| M2-AAb                                                       |          | 0       |          | 1        | 1.39     | 1.60 | 0.87    | 0.3895  | 0.3895 | -1.81 | 4.58  | -1.81     | 4.58      |
| M2-AAb*Sector                                                | sector10 | 1       | sector6  | 1        | -1.90    | 0.35 | -5.47   | <.0001  | 0.0001 | -2.59 | -1.21 | -3.21     | -0.59     |
| M2-AAb*Sector                                                | sector4  | 1       | sector9  | 1        | 1.89     | 0.35 | 5.43    | <.0001  | 0.0001 | 1.20  | 2.58  | 0.58      | 3.20      |
| M2-AAb*Sector                                                | sector12 | 1       | sector9  | 1        | 1.53     | 0.29 | 5.24    | <.0001  | 0.0003 | 0.95  | 2.11  | 0.43      | 2.63      |
| M2-AAb*Sector                                                | sector5  | 1       | sector9  | 1        | 1.60     | 0.31 | 5.14    | <.0001  | 0.0005 | 0.98  | 2.22  | 0.43      | 2.77      |
| M2-AAb*Sector                                                | sector10 | 1       | sector4  | 1        | -1.68    | 0.33 | -5.03   | <.0001  | 0.0007 | -2.35 | -1.02 | -2.94     | -0.42     |
| M2-AAb*Sector                                                | sector1  | 1       | sector10 | 1        | 1.61     | 0.34 | 4.75    | <.0001  | 0.002  | 0.94  | 2.29  | 0.33      | 2.90      |
| M2-AAb*Sector                                                | sector10 | 1       | sector7  | 1        | -1.68    | 0.36 | -4.68   | <.0001  | 0.0026 | -2.40 | -0.97 | -3.04     | -0.33     |
| M2-AAb*Sector                                                | sector3  | 1       | sector9  | 1        | 1.49     | 0.32 | 4.63    | <.0001  | 0.0031 | 0.85  | 2.13  | 0.28      | 2.71      |
| M2-AAb*Sector                                                | sector2  | 1       | sector9  | 1        | 1.55     | 0.34 | 4.6     | <.0001  | 0.0035 | 0.88  | 2.22  | 0.28      | 2.82      |
| M2-AAb*Sector                                                | sector8  | 1       | sector9  | 1        | 1.31     | 0.29 | 4.56    | <.0001  | 0.004  | 0.74  | 1.88  | 0.23      | 2.39      |
| M2-AAb*Sector                                                | sector10 | 1       | sector5  | 1        | -1.39    | 0.31 | -4.46   | <.0001  | 0.0057 | -2.01 | -0.77 | -2.57     | -0.21     |
| M2-AAb*Sector                                                | sector10 | 1       | sector12 | 1        | -1.32    | 0.31 | -4.22   | <.0001  | 0.0125 | -1.94 | -0.70 | -2.50     | -0.14     |
| M2-AAb*Sector                                                | sector10 | 1       | sector3  | 1        | -1.29    | 0.31 | -4.17   | <.0001  | 0.0149 | -1.90 | -0.67 | -2.45     | -0.12     |
| M2-AAb*Sector                                                | sector11 | 1       | sector9  | 1        | 1.18     | 0.30 | 3.9     | 0.0002  | 0.0347 | 0.58  | 1.78  | 0.04      | 2.32      |
| M2-AAb*Sector                                                | sector10 | 1       | sector2  | 1        | -1.34    | 0.36 | -3.72   | 0.0004  | 0.0577 | -2.06 | -0.63 | -2.71     | 0.02      |
| M2-AAb*Sector                                                | sector10 | 1       | sector11 | 1        | -0.97    | 0.27 | -3.56   | 0.0006  | 0.0897 | -1.52 | -0.43 | -2.01     | 0.06      |

|               |          |   |          |   |       |      |       |        |        |       |       |       |       |
|---------------|----------|---|----------|---|-------|------|-------|--------|--------|-------|-------|-------|-------|
| M2-AAb*Sector | sector5  | 0 | sector7  | 0 | -3.24 | 0.98 | -3.29 | 0.0015 | 0.1749 | -5.20 | -1.28 | -6.95 | 0.47  |
| M2-AAb*Sector | sector7  | 0 | sector9  | 0 | 4.34  | 1.32 | 3.28  | 0.0016 | 0.1798 | 1.70  | 6.97  | -0.65 | 9.33  |
| M2-AAb*Sector | sector10 | 1 | sector8  | 1 | -1.10 | 0.34 | -3.23 | 0.0018 | 0.1986 | 1.78  | 0.42  | -2.39 | 0.18  |
| M2-AAb*Sector | sector4  | 0 | sector7  | 0 | -3.71 | 1.27 | -2.92 | 0.0045 | 0.368  | 6.24  | 1.19  | -8.50 | 1.07  |
| M2-AAb*Sector | sector6  | 1 | sector8  | 1 | 0.80  | 0.28 | 2.9   | 0.0049 | 0.3868 | 0.25  | 1.35  | -0.24 | 1.84  |
| M2-AAb*Sector | sector10 | 0 | sector7  | 0 | -3.92 | 1.41 | -2.78 | 0.0069 | 0.4702 | 6.73  | 1.11  | -9.24 | 1.40  |
| M2-AAb*Sector | sector11 | 1 | sector6  | 1 | -0.93 | 0.35 | -2.67 | 0.0091 | 0.5448 | 1.62  | 0.24  | -2.23 | 0.38  |
| M2-AAb*Sector | sector7  | 0 | sector9  | 1 | 5.12  | 1.95 | 2.63  | 0.0102 | 0.5764 | 1.25  | 8.99  | -2.22 | 12.45 |
| M2-AAb*Sector | sector7  | 0 | sector10 | 1 | 4.91  | 1.95 | 2.52  | 0.0137 | 0.6559 | 1.04  | 8.79  | -2.43 | 12.25 |
| M2-AAb*Sector | sector2  | 0 | sector9  | 0 | 3.25  | 1.32 | 2.45  | 0.0164 | 0.7055 | 0.61  | 5.88  | -1.74 | 8.24  |
| M2-AAb*Sector | sector11 | 1 | sector4  | 1 | -0.71 | 0.29 | -2.45 | 0.0165 | 0.7063 | 1.28  | 0.13  | -1.80 | 0.38  |
| M2-AAb*Sector | sector7  | 1 | sector8  | 1 | 0.58  | 0.24 | 2.43  | 0.0176 | 0.7242 | 0.10  | 1.06  | -0.32 | 1.48  |
| M2-AAb*Sector | sector2  | 0 | sector9  | 1 | 4.03  | 1.72 | 2.34  | 0.0217 | 0.778  | 0.60  | 7.45  | -2.46 | 10.51 |
| M2-AAb*Sector | sector7  | 0 | sector8  | 0 | 2.17  | 0.94 | 2.32  | 0.0231 | 0.7938 | 0.31  | 4.04  | -1.36 | 5.71  |
| M2-AAb*Sector | sector12 | 0 | sector9  | 0 | 2.60  | 1.14 | 2.28  | 0.0255 | 0.8163 | 0.33  | 4.88  | -1.71 | 6.91  |
| M2-AAb*Sector | sector6  | 0 | sector9  | 0 | 3.15  | 1.41 | 2.24  | 0.0281 | 0.8386 | 0.35  | 5.96  | -2.16 | 8.47  |
| M2-AAb*Sector | sector2  | 0 | sector10 | 1 | 3.82  | 1.72 | 2.22  | 0.0293 | 0.8477 | 0.39  | 7.25  | -2.67 | 10.31 |
| M2-AAb*Sector | sector2  | 0 | sector4  | 0 | 2.62  | 1.19 | 2.21  | 0.0301 | 0.853  | 0.26  | 4.98  | -1.85 | 7.10  |

|               |          |   |          |   |       |      |       |        |        |       |       |       |       |
|---------------|----------|---|----------|---|-------|------|-------|--------|--------|-------|-------|-------|-------|
| M2-AAb*Sector | sector1  | 1 | sector11 | 1 | 0.64  | 0.30 | 2.15  | 0.0343 | 0.8794 | 0.05  | 1.23  | -0.48 | 1.76  |
| M2-AAb*Sector | sector4  | 0 | sector6  | 0 | -2.53 | 1.18 | -2.15 | 0.0347 | 0.8813 | -4.87 | -0.19 | -6.96 | 1.91  |
| M2-AAb*Sector | sector11 | 1 | sector7  | 1 | -0.71 | 0.34 | -2.06 | 0.0431 | 0.9183 | -1.39 | 0.02  | -2.01 | 0.59  |
| M2-AAb*Sector | sector7  | 0 | sector11 | 1 | 3.94  | 1.92 | 2.05  | 0.0437 | 0.9206 | 0.11  | 7.76  | -3.31 | 11.18 |
| M2-AAb*Sector | sector3  | 1 | sector6  | 1 | -0.62 | 0.31 | -2.02 | 0.0468 | 0.9305 | -1.22 | 0.01  | -1.77 | 0.53  |
| M2-AAb*Sector | sector10 | 0 | sector6  | 0 | -2.73 | 1.36 | -2    | 0.0486 | 0.9355 | -5.45 | 0.02  | -7.88 | 2.41  |
| M2-AAb*Sector | sector10 | 0 | sector2  | 0 | -2.83 | 1.42 | -1.99 | 0.0497 | 0.9383 | -5.65 | 0.00  | -8.18 | 2.52  |
| M2-AAb*Sector | sector6  | 0 | sector9  | 1 | 3.93  | 1.97 | 1.99  | 0.0497 | 0.9384 | 0.00  | 7.86  | -3.51 | 11.38 |
| M2-AAb*Sector | sector1  | 1 | sector9  | 1 | 1.82  | 0.32 | 5.67  | <.0001 | <.0001 | 1.18  | 2.46  | 0.61  | 3.03  |
| M2-AAb*Sector | sector6  | 1 | sector9  | 1 | 2.11  | 0.36 | 5.87  | <.0001 | <.0001 | 1.39  | 2.82  | 0.75  | 3.46  |
| M2-AAb*Sector | sector7  | 1 | sector9  | 1 | 1.89  | 0.34 | 5.6   | <.0001 | <.0001 | 1.22  | 2.56  | 0.62  | 3.16  |
| M2-AAb*Sector | sector7  | 1 | sector9  | 1 | 1.89  | 0.34 | 5.6   | <.0001 | <.0001 | 1.22  | 2.56  | 0.62  | 3.16  |

\*\* interaction term  
significant p-value=0.038

| Differences of Least Squares Means (Sector*Noci-AAb) for ICP** |          |           |         |            |          |      |         |         |        |       |       |           |           |
|----------------------------------------------------------------|----------|-----------|---------|------------|----------|------|---------|---------|--------|-------|-------|-----------|-----------|
| Effect                                                         | Sector   | Noci-AAb* | _Sector | _Noci-AAb* | Estimate | SE   | t Value | Pr >  t | Adj P  | Lower | Upper | Adj Lower | Adj Upper |
| Noci-AAb                                                       |          | 0         |         | 1          | -0.03    | 0.74 | -0.04   | 0.9685  | 0.9685 | -1.51 | 1.45  | -1.51     | 1.45      |
| Noci-AAb*Sector                                                | sector10 | 0         | sector5 | 0          | 1.91     | 0.37 | 5.11    | <.0001  | 0.0001 | 1.18  | 2.64  | 0.55      | 3.27      |
| Noci-AAb*Sector                                                | sector1  | 0         | sector3 | 0          | -1.87    | 0.37 | -5.02   | <.0001  | 0.0002 | -2.61 | -1.14 | -3.23     | -0.51     |
| Noci-AAb*Sector                                                | sector1  | 0         | sector4 | 0          | -1.87    | 0.37 | -5      | <.0001  | 0.0002 | -2.60 | -1.13 | -3.23     | -0.51     |

|                 |              |   |          |   |       |      |       |        |         |       |       |       |       |
|-----------------|--------------|---|----------|---|-------|------|-------|--------|---------|-------|-------|-------|-------|
| Noci-AAb*Sector | sector1<br>1 | 0 | sector7  | 0 | 1.82  | 0.37 | 4.87  | <.0001 | 0.0003  | 1.09  | 2.55  | 0.46  | 3.18  |
| Noci-AAb*Sector | sector1<br>2 | 1 | sector4  | 1 | -2.68 | 0.55 | -4.89 | <.0001 | 0.0003  | -3.75 | -1.60 | -4.68 | -0.68 |
| Noci-AAb*Sector | sector1<br>2 | 0 | sector3  | 0 | -1.76 | 0.37 | -4.71 | <.0001 | 0.0007  | -2.49 | -1.02 | -3.12 | -0.40 |
| Noci-AAb*Sector | sector1<br>2 | 0 | sector4  | 0 | -1.75 | 0.37 | -4.69 | <.0001 | 0.0008  | -2.48 | -1.02 | -3.11 | -0.39 |
| Noci-AAb*Sector | sector6      | 0 | sector9  | 0 | -1.73 | 0.37 | -4.63 | <.0001 | 0.0001  | -2.46 | -1.00 | -3.09 | -0.37 |
| Noci-AAb*Sector | sector1<br>0 | 1 | sector12 | 1 | 2.46  | 0.55 | 4.49  | <.0001 | 0.0009  | 1.39  | 3.54  | 0.46  | 4.46  |
| Noci-AAb*Sector | sector1      | 0 | sector10 | 0 | -1.66 | 0.37 | -4.46 | <.0001 | 0.0022  | -2.40 | -0.93 | -3.03 | -0.30 |
| Noci-AAb*Sector | sector1      | 1 | sector4  | 1 | -2.40 | 0.55 | -4.38 | <.0001 | 0.0032  | -3.47 | -1.32 | -4.40 | -0.40 |
| Noci-AAb*Sector | sector2      | 0 | sector7  | 0 | 1.61  | 0.37 | 4.31  | <.0001 | 0.0042  | 0.88  | 2.34  | 0.25  | 2.97  |
| Noci-AAb*Sector | sector1<br>0 | 0 | sector12 | 0 | 1.55  | 0.37 | 4.15  | <.0001 | 0.0008  | 0.82  | 2.28  | 0.19  | 2.91  |
| Noci-AAb*Sector | sector1<br>1 | 0 | sector6  | 0 | 1.53  | 0.37 | 4.11  | <.0001 | 0.0094  | 0.80  | 2.27  | 0.17  | 2.90  |
| Noci-AAb*Sector | sector1<br>2 | 1 | sector3  | 1 | -2.21 | 0.55 | -4.04 | <.0001 | 0.00125 | -3.29 | -1.14 | -4.21 | -0.21 |
| Noci-AAb*Sector | sector8      | 0 | sector9  | 0 | -1.49 | 0.37 | -3.98 | <.0001 | 0.00156 | -2.22 | -0.75 | -2.85 | -0.12 |
| Noci-AAb*Sector | sector1      | 1 | sector10 | 1 | -2.18 | 0.55 | -3.98 | <.0001 | 0.00158 | -3.25 | -1.10 | -4.18 | -0.18 |
| Noci-AAb*Sector | sector5      | 0 | sector9  | 0 | -1.38 | 0.37 | -3.7  | 0.0002 | 0.00417 | -2.11 | -0.65 | -2.74 | -0.02 |
| Noci-AAb*Sector | sector4      | 1 | sector6  | 1 | 1.95  | 0.55 | 3.56  | 0.0004 | 0.00672 | 0.87  | 3.02  | -0.05 | 3.95  |
| Noci-AAb*Sector | sector2      | 0 | sector6  | 0 | 1.33  | 0.37 | 3.55  | 0.0004 | 0.00683 | 0.59  | 2.06  | -0.04 | 2.69  |
| Noci-AAb*Sector | sector1<br>1 | 1 | sector4  | 1 | -1.94 | 0.55 | -3.53 | 0.0004 | 0.00721 | -3.01 | -0.86 | -3.93 | 0.06  |

|                 |          |   |          |   |       |      |       |        |        |       |       |       |      |
|-----------------|----------|---|----------|---|-------|------|-------|--------|--------|-------|-------|-------|------|
| Noci-AAb*Sector | sector1  | 1 | sector3  | 1 | -1.93 | 0.55 | -3.52 | 0.0005 | 0.0749 | -3.00 | -0.85 | -3.93 | 0.07 |
| Noci-AAb*Sector | sector11 | 0 | sector8  | 0 | 1.29  | 0.37 | 3.46  | 0.0006 | 0.0907 | 0.56  | 2.02  | -0.07 | 2.65 |
| Noci-AAb*Sector | sector7  | 0 | sector4  | 1 | -2.84 | 0.87 | -3.26 | 0.0011 | 0.1579 | -4.54 | -1.13 | -6.01 | 0.34 |
| Noci-AAb*Sector | sector2  | 1 | sector4  | 1 | -1.79 | 0.55 | -3.26 | 0.0012 | 0.1587 | -2.86 | -0.71 | -3.78 | 0.21 |
| Noci-AAb*Sector | sector11 | 0 | sector5  | 0 | 1.19  | 0.37 | 3.18  | 0.0015 | 0.1938 | 0.46  | 1.92  | -0.17 | 2.55 |
| Noci-AAb*Sector | sector12 | 1 | sector9  | 1 | -1.73 | 0.55 | -3.17 | 0.0016 | 0.2015 | -2.81 | -0.66 | -3.73 | 0.26 |
| Noci-AAb*Sector | sector10 | 1 | sector6  | 1 | 1.73  | 0.55 | 3.16  | 0.0016 | 0.2058 | 0.65  | 2.81  | -0.27 | 3.73 |
| Noci-AAb*Sector | sector10 | 1 | sector11 | 1 | 1.72  | 0.55 | 3.14  | 0.0018 | 0.2173 | 0.64  | 2.79  | -0.28 | 3.72 |
| Noci-AAb*Sector | sector4  | 1 | sector7  | 1 | 1.68  | 0.55 | 3.06  | 0.0023 | 0.260  | 0.60  | 2.75  | -0.32 | 3.67 |
| Noci-AAb*Sector | sector1  | 0 | sector9  | 0 | -1.14 | 0.37 | -3.05 | 0.0024 | 0.2658 | -1.87 | -0.41 | -2.50 | 0.22 |
| Noci-AAb*Sector | sector2  | 0 | sector3  | 0 | -1.14 | 0.37 | -3.05 | 0.0024 | 0.2667 | -1.87 | -0.41 | -2.50 | 0.22 |
| Noci-AAb*Sector | sector2  | 0 | sector4  | 0 | -1.13 | 0.37 | -3.03 | 0.0025 | 0.2757 | -1.86 | -0.40 | -2.49 | 0.23 |
| Noci-AAb*Sector | sector7  | 0 | sector10 | 1 | -2.62 | 0.87 | -3.01 | 0.0027 | 0.2896 | -4.33 | -0.91 | -5.79 | 0.55 |
| Noci-AAb*Sector | sector3  | 0 | sector12 | 1 | 2.59  | 0.87 | 2.98  | 0.003  | 0.3105 | 0.88  | 4.30  | -0.58 | 5.76 |
| Noci-AAb*Sector | sector4  | 0 | sector12 | 1 | 2.58  | 0.87 | 2.97  | 0.003  | 0.3147 | 0.88  | 4.29  | -0.59 | 5.76 |
| Noci-AAb*Sector | sector6  | 0 | sector4  | 1 | -2.55 | 0.87 | -2.94 | 0.0034 | 0.3393 | -4.26 | -0.85 | -5.73 | 0.62 |
| Noci-AAb*Sector | sector2  | 0 | sector8  | 0 | 1.08  | 0.37 | 2.9   | 0.0038 | 0.3647 | 0.35  | 1.81  | -0.28 | 2.44 |
| Noci-AAb*Sector | sector10 | 1 | sector2  | 1 | 1.57  | 0.55 | 2.86  | 0.0043 | 0.3923 | 0.49  | 2.64  | -0.43 | 3.57 |

|                 |          |   |          |   |       |      |       |        |        |       |       |       |      |
|-----------------|----------|---|----------|---|-------|------|-------|--------|--------|-------|-------|-------|------|
| Noci-AAb*Sector | sector12 | 0 | sector9  | 0 | -1.02 | 0.37 | -2.74 | 0.0063 | 0.4849 | -1.76 | -0.29 | -2.38 | 0.34 |
| Noci-AAb*Sector | sector10 | 0 | sector12 | 1 | 2.38  | 0.87 | 2.74  | 0.0063 | 0.4858 | 0.68  | 4.09  | -0.79 | 5.56 |
| Noci-AAb*Sector | sector7  | 0 | sector3  | 1 | -2.37 | 0.87 | -2.72 | 0.0066 | 0.4974 | -4.08 | -0.66 | -5.54 | 0.80 |
| Noci-AAb*Sector | sector3  | 1 | sector6  | 1 | 1.48  | 0.55 | 2.7   | 0.007  | 0.5139 | 0.41  | 2.56  | -0.52 | 3.48 |
| Noci-AAb*Sector | sector4  | 1 | sector5  | 1 | 1.48  | 0.55 | 2.7   | 0.0072 | 0.5206 | 0.40  | 2.55  | -0.52 | 3.48 |
| Noci-AAb*Sector | sector6  | 0 | sector10 | 1 | -2.33 | 0.87 | -2.68 | 0.0074 | 0.5296 | -4.04 | -0.63 | -5.51 | 0.84 |
| Noci-AAb*Sector | sector11 | 1 | sector3  | 1 | -1.47 | 0.55 | -2.68 | 0.0075 | 0.5318 | -2.54 | -0.39 | -3.47 | 0.53 |
| Noci-AAb*Sector | sector10 | 1 | sector7  | 1 | 1.46  | 0.55 | 2.66  | 0.0079 | 0.5487 | 0.38  | 2.53  | -0.54 | 3.46 |
| Noci-AAb*Sector | sector8  | 0 | sector4  | 1 | -2.31 | 0.87 | -2.66 | 0.0081 | 0.5527 | -4.02 | -0.60 | -5.48 | 0.86 |
| Noci-AAb*Sector | sector12 | 0 | sector7  | 0 | 0.99  | 0.37 | 2.65  | 0.0081 | 0.5548 | 0.26  | 1.72  | -0.37 | 2.35 |
| Noci-AAb*Sector | sector3  | 0 | sector1  | 1 | 2.31  | 0.87 | 2.65  | 0.0081 | 0.5549 | 0.60  | 4.01  | -0.87 | 5.48 |
| Noci-AAb*Sector | sector1  | 1 | sector9  | 1 | -1.45 | 0.55 | -2.65 | 0.0082 | 0.5572 | -2.53 | -0.38 | -3.45 | 0.55 |
| Noci-AAb*Sector | sector4  | 0 | sector1  | 1 | 2.30  | 0.87 | 2.65  | 0.0083 | 0.56   | 0.59  | 4.01  | -0.87 | 5.47 |
| Noci-AAb*Sector | sector2  | 0 | sector5  | 0 | 0.98  | 0.37 | 2.62  | 0.0089 | 0.579  | 0.25  | 1.71  | -0.38 | 2.34 |
| Noci-AAb*Sector | sector5  | 0 | sector4  | 1 | -2.21 | 0.87 | -2.54 | 0.0114 | 0.6472 | -3.91 | -0.50 | -5.38 | 0.97 |
| Noci-AAb*Sector | sector1  | 0 | sector11 | 0 | -0.94 | 0.37 | -2.53 | 0.0116 | 0.6537 | -1.68 | -0.21 | -2.31 | 0.42 |
| Noci-AAb*Sector | sector4  | 1 | sector8  | 1 | 1.38  | 0.55 | 2.52  | 0.0119 | 0.6592 | 0.31  | 2.46  | -0.62 | 3.38 |
| Noci-AAb*Sector | sector10 | 0 | sector2  | 0 | 0.93  | 0.37 | 2.49  | 0.0129 | 0.6824 | 0.20  | 1.66  | -0.43 | 2.29 |

|                 |              |   |          |   |       |      |       |        |        |       |       |       |      |
|-----------------|--------------|---|----------|---|-------|------|-------|--------|--------|-------|-------|-------|------|
| Noci-AAb*Sector | sector1<br>1 | 0 | sector3  | 0 | -0.93 | 0.37 | -2.49 | 0.013  | 0.6846 | -1.66 | -0.20 | -2.29 | 0.43 |
| Noci-AAb*Sector | sector1<br>1 | 0 | sector4  | 0 | -0.92 | 0.37 | -2.47 | 0.0136 | 0.6958 | -1.66 | -0.19 | -2.29 | 0.44 |
| Noci-AAb*Sector | sector1<br>0 | 0 | sector1  | 1 | 2.10  | 0.87 | 2.41  | 0.016  | 0.7394 | 0.39  | 3.81  | -1.07 | 5.27 |
| Noci-AAb*Sector | sector2      | 1 | sector3  | 1 | -1.32 | 0.55 | -2.41 | 0.0163 | 0.7442 | -2.39 | -0.24 | -3.32 | 0.68 |
| Noci-AAb*Sector | sector8      | 0 | sector10 | 1 | -2.09 | 0.87 | -2.4  | 0.0164 | 0.7461 | 3.80  | 0.38  | -5.26 | 1.08 |
| Noci-AAb*Sector | sector6      | 0 | sector3  | 1 | -2.09 | 0.87 | -2.4  | 0.0167 | 0.7503 | 3.79  | 0.38  | -5.26 | 1.09 |
| Noci-AAb*Sector | sector1<br>2 | 1 | sector8  | 1 | -1.30 | 0.55 | -2.37 | 0.018  | 0.7693 | -2.37 | -0.22 | -3.30 | 0.70 |
| Noci-AAb*Sector | sector1      | 0 | sector7  | 0 | 0.87  | 0.37 | 2.34  | 0.0193 | 0.7869 | 0.14  | 1.61  | -0.49 | 2.24 |
| Noci-AAb*Sector | sector1<br>0 | 1 | sector5  | 1 | 1.26  | 0.55 | 2.3   | 0.0219 | 0.8164 | 0.18  | 2.33  | -0.74 | 3.26 |
| Noci-AAb*Sector | sector5      | 0 | sector10 | 1 | -1.99 | 0.87 | -2.29 | 0.0225 | 0.8231 | 3.69  | 0.28  | -5.16 | 1.19 |
| Noci-AAb*Sector | sector1      | 0 | sector4  | 1 | -1.96 | 0.87 | -2.26 | 0.0243 | 0.84   | 3.67  | 0.26  | -5.14 | 1.21 |
| Noci-AAb*Sector | sector1<br>1 | 0 | sector12 | 0 | 0.83  | 0.37 | 2.22  | 0.0267 | 0.8597 | 0.10  | 1.56  | -0.53 | 2.19 |
| Noci-AAb*Sector | sector3      | 1 | sector7  | 1 | 1.21  | 0.55 | 2.21  | 0.0276 | 0.8665 | 0.13  | 2.28  | -0.79 | 3.21 |
| Noci-AAb*Sector | sector1<br>2 | 1 | sector5  | 1 | -1.20 | 0.55 | -2.2  | 0.0283 | 0.8714 | 2.28  | 0.13  | -3.20 | 0.80 |
| Noci-AAb*Sector | sector7      | 0 | sector9  | 1 | -1.89 | 0.87 | -2.18 | 0.0299 | 0.8814 | 3.60  | 0.19  | -5.07 | 1.28 |
| Noci-AAb*Sector | sector3      | 0 | sector6  | 1 | 1.86  | 0.87 | 2.14  | 0.0328 | 0.8983 | 0.15  | 3.57  | -1.31 | 5.03 |
| Noci-AAb*Sector | sector9      | 0 | sector12 | 1 | 1.86  | 0.87 | 2.13  | 0.0331 | 0.8998 | 0.15  | 3.56  | -1.32 | 5.03 |
| Noci-AAb*Sector | sector4      | 0 | sector6  | 1 | 1.85  | 0.87 | 2.13  | 0.0333 | 0.9009 | 0.15  | 3.56  | -1.32 | 5.03 |

|                 |              |   |          |   |       |      |       |        |        |       |       |       |      |
|-----------------|--------------|---|----------|---|-------|------|-------|--------|--------|-------|-------|-------|------|
| Noci-AAb*Sector | sector1<br>2 | 0 | sector4  | 1 | -1.85 | 0.87 | -2.12 | 0.034  | 0.9041 | -3.55 | -0.14 | -5.02 | 1.33 |
| Noci-AAb*Sector | sector3      | 0 | sector11 | 1 | 1.85  | 0.87 | 2.12  | 0.034  | 0.9042 | 0.14  | 3.55  | -1.33 | 5.02 |
| Noci-AAb*Sector | sector1<br>0 | 1 | sector8  | 1 | 1.16  | 0.55 | 2.12  | 0.0341 | 0.9045 | 0.09  | 2.24  | -0.84 | 3.16 |
| Noci-AAb*Sector | sector8      | 0 | sector3  | 1 | -1.84 | 0.87 | -2.12 | 0.0344 | 0.9063 | -3.55 | -0.14 | -5.02 | 1.33 |
| Noci-AAb*Sector | sector4      | 0 | sector11 | 1 | 1.84  | 0.87 | 2.12  | 0.0345 | 0.9067 | 0.13  | 3.55  | -1.33 | 5.01 |
| Noci-AAb*Sector | sector1      | 0 | sector10 | 1 | -1.74 | 0.87 | -2    | 0.0453 | 0.9447 | -3.45 | 0.04  | -4.92 | 1.43 |
| Noci-AAb*Sector | sector5      | 0 | sector3  | 1 | -1.74 | 0.87 | -2    | 0.0459 | 0.9462 | -3.45 | 0.03  | -4.91 | 1.43 |
| Noci-AAb*Sector | sector1      | 0 | sector2  | 0 | -0.73 | 0.37 | -1.97 | 0.0493 | 0.9541 | -1.47 | 0.00  | -2.10 | 0.63 |
| Noci-AAb*Sector | sector3      | 0 | sector9  | 0 | 0.73  | 0.37 | 1.97  | 0.0495 | 0.9545 | 0.00  | 1.47  | -0.63 | 2.10 |
| Noci-AAb*Sector | sector1<br>0 | 0 | sector6  | 0 | 2.26  | 0.37 | 6.04  | <.0001 | <.0001 | 1.52  | 2.99  | 0.89  | 3.62 |
| Noci-AAb*Sector | sector1<br>0 | 0 | sector7  | 0 | 2.54  | 0.37 | 6.8   | <.0001 | <.0001 | 1.81  | 3.27  | 1.18  | 3.90 |
| Noci-AAb*Sector | sector1<br>0 | 0 | sector8  | 0 | 2.01  | 0.37 | 5.39  | <.0001 | <.0001 | 1.28  | 2.74  | 0.65  | 3.37 |
| Noci-AAb*Sector | sector3      | 0 | sector5  | 0 | 2.12  | 0.37 | 5.67  | <.0001 | <.0001 | 1.38  | 2.85  | 0.75  | 3.48 |
| Noci-AAb*Sector | sector3      | 0 | sector6  | 0 | 2.46  | 0.37 | 6.6   | <.0001 | <.0001 | 1.73  | 3.20  | 1.10  | 3.83 |
| Noci-AAb*Sector | sector3      | 0 | sector7  | 0 | 2.75  | 0.37 | 7.36  | <.0001 | <.0001 | 2.01  | 3.48  | 1.39  | 4.11 |
| Noci-AAb*Sector | sector3      | 0 | sector8  | 0 | 2.22  | 0.37 | 5.95  | <.0001 | <.0001 | 1.49  | 2.95  | 0.86  | 3.58 |
| Noci-AAb*Sector | sector4      | 0 | sector5  | 0 | 2.11  | 0.37 | 5.66  | <.0001 | <.0001 | 1.38  | 2.84  | 0.75  | 3.47 |
| Noci-AAb*Sector | sector4      | 0 | sector6  | 0 | 2.46  | 0.37 | 6.59  | <.0001 | <.0001 | 1.73  | 3.19  | 1.10  | 3.82 |

|                 |         |   |         |   |       |      |       |       |       |       |       |       |       |
|-----------------|---------|---|---------|---|-------|------|-------|-------|-------|-------|-------|-------|-------|
| Noci-AAb*Sector | sector4 | 0 | sector7 | 0 | 2.74  | 0.37 | 7.35  | <.001 | <.001 | 2.01  | 3.47  | 1.38  | 4.10  |
| Noci-AAb*Sector | sector4 | 0 | sector8 | 0 | 2.21  | 0.37 | 5.93  | <.001 | <.001 | 1.48  | 2.95  | 0.85  | 3.58  |
| Noci-AAb*Sector | sector7 | 0 | sector9 | 0 | -2.01 | 0.37 | -5.39 | <.001 | <.001 | -2.75 | -1.28 | -3.38 | -0.65 |
| Noci-AAb*Sector | sector7 | 0 | sector9 | 0 | -2.01 | 0.37 | -5.39 | <.001 | <.001 | -2.75 | -1.28 | -3.38 | -0.65 |

\*\* interaction term  
significant p-value=0.013

| Differences of Least Squares Means (Sector*Noci-AAb) for DCP** |          |           |         |            |          |      |         |         |        |       |       |           |           |
|----------------------------------------------------------------|----------|-----------|---------|------------|----------|------|---------|---------|--------|-------|-------|-----------|-----------|
| Effect                                                         | Sector   | Noci-AAb* | _Sector | _Noci-AAb* | Estimate | SE   | t Value | Pr >  t | Adj P  | Lower | Upper | Adj Lower | Adj Upper |
| Noci-AAb                                                       |          | 0         |         | 1          | 0.37     | 0.86 | 0.42    | 0.6732  | 0.6732 | -1.35 | 2.09  | -1.35     | 2.09      |
| Noci-AAb*Sector                                                | sector4  | 0         | sector6 | 0          | 2.01     | 0.37 | 5.44    | <.001   | 0.001  | 1.27  | 2.74  | 0.62      | 3.40      |
| Noci-AAb*Sector                                                | sector3  | 0         | sector6 | 0          | 2.39     | 0.45 | 5.36    | <.001   | 0.002  | 1.50  | 3.28  | 0.71      | 4.07      |
| Noci-AAb*Sector                                                | sector3  | 0         | sector5 | 0          | 2.09     | 0.39 | 5.29    | <.001   | 0.003  | 1.30  | 2.88  | 0.60      | 3.58      |
| Noci-AAb*Sector                                                | sector3  | 0         | sector9 | 0          | 2.43     | 0.49 | 4.92    | <.001   | 0.011  | 1.45  | 3.41  | 0.57      | 4.29      |
| Noci-AAb*Sector                                                | sector2  | 0         | sector8 | 0          | 2.29     | 0.51 | 4.46    | <.001   | 0.005  | 1.27  | 3.31  | 0.36      | 4.23      |
| Noci-AAb*Sector                                                | sector10 | 0         | sector8 | 0          | 1.75     | 0.42 | 4.12    | <.001   | 0.017  | 0.90  | 2.59  | 0.15      | 3.34      |
| Noci-AAb*Sector                                                | sector4  | 0         | sector9 | 0          | 2.04     | 0.51 | 4.02    | 0.001   | 0.023  | 1.03  | 3.05  | 0.13      | 3.96      |
| Noci-AAb*Sector                                                | sector11 | 0         | sector3 | 0          | -1.51    | 0.47 | -3.23   | 0.0018  | 0.2016 | -2.44 | -0.58 | -3.27     | 0.25      |
| Noci-AAb*Sector                                                | sector11 | 1         | sector4 | 1          | -2.49    | 0.78 | -3.2    | 0.002   | 0.219  | -4.04 | -0.94 | -5.42     | 0.44      |
| Noci-AAb*Sector                                                | sector2  | 0         | sector7 | 0          | 1.73     | 0.54 | 3.2     | 0.002   | 0.214  | 0.65  | 2.81  | -0.31     | 3.78      |
| Noci-AAb*Sector                                                | sector12 | 1         | sector4 | 1          | -2.57    | 0.81 | -3.18   | 0.0021  | 0.2204 | -4.17 | -0.96 | -5.61     | 0.47      |

|                 |              |   |          |   |       |      |       |        |        |       |       |       |      |
|-----------------|--------------|---|----------|---|-------|------|-------|--------|--------|-------|-------|-------|------|
| Noci-AAb*Sector | sector1<br>0 | 0 | sector3  | 0 | -1.37 | 0.43 | -3.18 | 0.0021 | 0.218  | -2.22 | -0.51 | -2.98 | 0.25 |
| Noci-AAb*Sector | sector3      | 0 | sector12 | 1 | 3.17  | 1.03 | 3.09  | 0.0028 | 0.2677 | 1.13  | 5.22  | -0.70 | 7.04 |
| Noci-AAb*Sector | sector2      | 0 | sector9  | 0 | 1.61  | 0.53 | 3.06  | 0.0031 | 0.2879 | 0.56  | 2.65  | -0.38 | 3.59 |
| Noci-AAb*Sector | sector1<br>2 | 0 | sector8  | 0 | 1.51  | 0.51 | 2.98  | 0.0038 | 0.3328 | 0.50  | 2.52  | -0.40 | 3.43 |
| Noci-AAb*Sector | sector2      | 0 | sector6  | 0 | 1.57  | 0.53 | 2.95  | 0.0042 | 0.3508 | 0.51  | 2.63  | -0.44 | 3.58 |
| Noci-AAb*Sector | sector1<br>2 | 1 | sector2  | 1 | -1.61 | 0.55 | -2.92 | 0.0046 | 0.3721 | -2.71 | -0.51 | -3.69 | 0.47 |
| Noci-AAb*Sector | sector4      | 1 | sector5  | 1 | 1.26  | 0.43 | 2.89  | 0.0049 | 0.388  | 0.39  | 2.12  | -0.38 | 2.89 |
| Noci-AAb*Sector | sector1<br>2 | 1 | sector3  | 1 | -2.03 | 0.71 | -2.88 | 0.0052 | 0.3997 | -3.43 | -0.62 | -4.69 | 0.63 |
| Noci-AAb*Sector | sector1      | 0 | sector8  | 0 | 1.62  | 0.57 | 2.87  | 0.0052 | 0.4013 | 0.50  | 2.75  | -0.51 | 3.75 |
| Noci-AAb*Sector | sector1<br>1 | 1 | sector3  | 1 | -1.95 | 0.69 | -2.84 | 0.0057 | 0.423  | -3.31 | -0.58 | -4.54 | 0.64 |
| Noci-AAb*Sector | sector4      | 0 | sector11 | 1 | 2.71  | 0.96 | 2.81  | 0.0063 | 0.4457 | 0.79  | 4.63  | -0.93 | 6.35 |
| Noci-AAb*Sector | sector5      | 0 | sector8  | 0 | 1.02  | 0.37 | 2.8   | 0.0065 | 0.4545 | 0.29  | 1.75  | -0.36 | 2.40 |
| Noci-AAb*Sector | sector8      | 0 | sector4  | 1 | -2.51 | 0.93 | -2.7  | 0.0084 | 0.522  | -4.35 | -0.66 | -6.00 | 0.99 |
| Noci-AAb*Sector | sector1      | 1 | sector4  | 1 | -2.12 | 0.80 | -2.66 | 0.0094 | 0.526  | -3.71 | -0.54 | -5.12 | 0.88 |
| Noci-AAb*Sector | sector4      | 0 | sector12 | 1 | 2.79  | 1.05 | 2.66  | 0.0095 | 0.5572 | 0.70  | 4.88  | -1.17 | 6.75 |
| Noci-AAb*Sector | sector1<br>1 | 1 | sector2  | 1 | -1.53 | 0.58 | -2.63 | 0.0104 | 0.5798 | -2.69 | -0.37 | -3.73 | 0.67 |
| Noci-AAb*Sector | sector1<br>0 | 1 | sector4  | 1 | -1.73 | 0.66 | -2.62 | 0.0104 | 0.5814 | -3.04 | -0.42 | -4.21 | 0.75 |
| Noci-AAb*Sector | sector2      | 0 | sector5  | 0 | 1.27  | 0.49 | 2.58  | 0.0117 | 0.6119 | 0.29  | 2.25  | -0.58 | 3.12 |

|                 |          |   |          |   |       |      |       |        |        |       |       |       |      |
|-----------------|----------|---|----------|---|-------|------|-------|--------|--------|-------|-------|-------|------|
| Noci-AAb*Sector | sector4  | 1 | sector9  | 1 | 1.90  | 0.75 | 2.55  | 0.0127 | 0.6361 | 0.42  | 3.39  | -0.91 | 4.71 |
| Noci-AAb*Sector | sector3  | 0 | sector1  | 1 | 2.73  | 1.07 | 2.54  | 0.0132 | 0.6463 | 0.59  | 4.86  | -1.33 | 6.78 |
| Noci-AAb*Sector | sector3  | 0 | sector10 | 1 | 2.33  | 0.93 | 2.5   | 0.0145 | 0.6723 | 0.48  | 4.19  | -1.19 | 5.85 |
| Noci-AAb*Sector | sector3  | 0 | sector9  | 1 | 2.51  | 1.02 | 2.46  | 0.016  | 0.6982 | 0.48  | 4.53  | -1.33 | 6.34 |
| Noci-AAb*Sector | sector2  | 0 | sector3  | 0 | -0.82 | 0.34 | -2.41 | 0.0185 | 0.7371 | -1.50 | -0.14 | -2.11 | 0.47 |
| Noci-AAb*Sector | sector1  | 1 | sector3  | 1 | -1.58 | 0.66 | -2.39 | 0.0192 | 0.7467 | -2.90 | -0.26 | -4.07 | 0.91 |
| Noci-AAb*Sector | sector10 | 0 | sector7  | 0 | 1.19  | 0.50 | 2.39  | 0.0192 | 0.7476 | 0.20  | 2.18  | -0.69 | 3.06 |
| Noci-AAb*Sector | sector1  | 1 | sector2  | 1 | -1.16 | 0.50 | -2.31 | 0.0233 | 0.7952 | -2.16 | -0.16 | -3.05 | 0.73 |
| Noci-AAb*Sector | sector6  | 0 | sector8  | 0 | 0.72  | 0.32 | 2.29  | 0.025  | 0.8118 | 0.09  | 1.35  | -0.47 | 1.91 |
| Noci-AAb*Sector | sector2  | 0 | sector11 | 1 | 2.27  | 1.00 | 2.28  | 0.0255 | 0.8171 | 0.29  | 4.26  | -1.49 | 6.04 |
| Noci-AAb*Sector | sector8  | 0 | sector3  | 1 | -1.97 | 0.87 | -2.26 | 0.0264 | 0.8249 | -3.70 | -0.24 | -5.24 | 1.31 |
| Noci-AAb*Sector | sector4  | 1 | sector6  | 1 | 1.20  | 0.54 | 2.22  | 0.0294 | 0.8485 | 0.12  | 2.28  | -0.84 | 3.24 |
| Noci-AAb*Sector | sector12 | 0 | sector4  | 0 | -1.21 | 0.55 | -2.21 | 0.0301 | 0.8532 | -2.31 | -0.12 | -3.29 | 0.86 |
| Noci-AAb*Sector | sector10 | 0 | sector4  | 0 | -0.98 | 0.45 | -2.19 | 0.0319 | 0.8657 | -1.87 | -0.09 | -2.67 | 0.71 |
| Noci-AAb*Sector | sector2  | 0 | sector12 | 1 | 2.35  | 1.08 | 2.18  | 0.0326 | 0.8694 | 0.20  | 4.51  | -1.72 | 6.43 |
| Noci-AAb*Sector | sector10 | 0 | sector6  | 0 | 1.03  | 0.48 | 2.16  | 0.0341 | 0.8782 | 0.08  | 1.97  | -0.77 | 2.82 |
| Noci-AAb*Sector | sector11 | 0 | sector9  | 0 | 0.92  | 0.43 | 2.15  | 0.0344 | 0.88   | 0.07  | 1.77  | -0.69 | 2.53 |
| Noci-AAb*Sector | sector4  | 0 | sector1  | 1 | 2.34  | 1.10 | 2.13  | 0.036  | 0.8881 | 0.16  | 4.52  | -1.79 | 6.48 |

|                 |              |   |          |   |       |      |       |        |        |       |       |       |      |
|-----------------|--------------|---|----------|---|-------|------|-------|--------|--------|-------|-------|-------|------|
| Noci-AAb*Sector | sector1<br>1 | 0 | sector4  | 0 | -1.12 | 0.53 | -2.12 | 0.0372 | 0.8943 | -2.18 | -0.07 | -3.12 | 0.87 |
| Noci-AAb*Sector | sector1<br>2 | 0 | sector2  | 0 | -0.78 | 0.38 | -2.07 | 0.0417 | 0.9132 | -1.53 | -0.03 | -2.20 | 0.64 |
| Noci-AAb*Sector | sector7      | 0 | sector4  | 1 | -1.95 | 0.95 | -2.05 | 0.0434 | 0.9196 | -3.84 | -0.06 | -5.53 | 1.63 |
| Noci-AAb*Sector | sector4      | 0 | sector9  | 1 | 2.12  | 1.04 | 2.04  | 0.0449 | 0.9244 | 0.05  | 4.19  | -1.80 | 6.05 |
| Noci-AAb*Sector | sector1      | 0 | sector4  | 0 | -1.10 | 0.54 | -2.03 | 0.0454 | 0.926  | -2.18 | -0.02 | -3.15 | 0.94 |
| Noci-AAb*Sector | sector4      | 0 | sector10 | 1 | 1.95  | 0.96 | 2.03  | 0.0455 | 0.9263 | 0.04  | 3.86  | -1.67 | 5.56 |
| Noci-AAb*Sector | sector3      | 0 | sector5  | 1 | 1.86  | 0.92 | 2.02  | 0.0473 | 0.9317 | 0.02  | 3.70  | -1.62 | 5.34 |
| Noci-AAb*Sector | sector3      | 0 | sector7  | 0 | 2.55  | 0.44 | 5.77  | <.0001 | <.0001 | 1.67  | 3.43  | 0.89  | 4.22 |
| Noci-AAb*Sector | sector3      | 0 | sector8  | 0 | 3.11  | 0.43 | 7.2   | <.0001 | <.0001 | 2.25  | 3.97  | 1.48  | 4.74 |
| Noci-AAb*Sector | sector4      | 0 | sector5  | 0 | 1.71  | 0.30 | 5.77  | <.0001 | <.0001 | 1.12  | 2.29  | 0.59  | 2.82 |
| Noci-AAb*Sector | sector4      | 0 | sector7  | 0 | 2.17  | 0.38 | 5.64  | <.0001 | <.0001 | 1.40  | 2.93  | 0.72  | 3.62 |
| Noci-AAb*Sector | sector4      | 0 | sector8  | 0 | 2.73  | 0.45 | 6.05  | <.0001 | <.0001 | 1.83  | 3.62  | 1.03  | 4.43 |

\*\* interaction term  
significant p-value=0.034

| Differences of Least Squares Means (Sector*β2-AAb) for DCP** |         |         |         |          |          |      |         |         |        |       |       |           |           |
|--------------------------------------------------------------|---------|---------|---------|----------|----------|------|---------|---------|--------|-------|-------|-----------|-----------|
| Effect                                                       | Sector  | β2-AAb* | _Sector | _β2-AAb* | Estimate | SE   | t Value | Pr >  t | Adj P  | Lower | Upper | Adj Lower | Adj Upper |
| β2-AAb                                                       |         | 0       |         | 1        | 1.43     | 1.66 | 0.87    | 0.3896  | 0.3896 | -1.86 | 4.73  | -1.86     | 4.73      |
| β2-AAb*Sector                                                | sector3 | 1       | sector6 | 1        | 1.90     | 0.39 | 4.85    | <.0001  | 0.0014 | 1.12  | 2.67  | 0.42      | 3.37      |
| β2-AAb*Sector                                                | sector3 | 1       | sector5 | 1        | 1.65     | 0.34 | 4.79    | <.0001  | 0.0017 | 0.97  | 2.34  | 0.35      | 2.95      |
| β2-AAb*Sector                                                | sector3 | 1       | sector7 | 1        | 1.84     | 0.39 | 4.69    | <.0001  | 0.0025 | 1.06  | 2.62  | 0.36      | 3.32      |

|                      |              |   |         |   |       |      |       |        |         |       |       |       |       |
|----------------------|--------------|---|---------|---|-------|------|-------|--------|---------|-------|-------|-------|-------|
| $\beta$ 2-AAb*Sector | sector1<br>1 | 1 | sector3 | 1 | -1.79 | 0.39 | -4.53 | <0.001 | 0.0043  | -2.57 | -1.00 | -3.27 | -0.30 |
| $\beta$ 2-AAb*Sector | sector1<br>2 | 1 | sector3 | 1 | -1.82 | 0.41 | -4.46 | <0.001 | 0.0057  | -2.63 | -1.01 | -3.36 | -0.28 |
| $\beta$ 2-AAb*Sector | sector1      | 1 | sector3 | 1 | -1.57 | 0.38 | -4.09 | 0.001  | 0.0019  | -2.33 | -0.80 | -3.01 | -0.12 |
| $\beta$ 2-AAb*Sector | sector1<br>1 | 1 | sector4 | 1 | -1.80 | 0.44 | -4.04 | 0.001  | 0.0022  | -2.68 | -0.91 | -3.47 | -0.12 |
| $\beta$ 2-AAb*Sector | sector1<br>0 | 1 | sector3 | 1 | -1.44 | 0.36 | -3.97 | 0.002  | 0.0027  | -2.16 | -0.72 | -2.80 | -0.07 |
| $\beta$ 2-AAb*Sector | sector1<br>2 | 1 | sector4 | 1 | -1.83 | 0.47 | -3.92 | 0.002  | 0.0032  | -2.76 | -0.90 | -3.59 | -0.07 |
| $\beta$ 2-AAb*Sector | sector1<br>0 | 1 | sector4 | 1 | -1.45 | 0.37 | -3.9  | 0.002  | 0.0034  | -2.18 | -0.71 | -2.84 | -0.05 |
| $\beta$ 2-AAb*Sector | sector2      | 1 | sector8 | 1 | 1.59  | 0.45 | 3.52  | 0.007  | 0.0098  | 0.69  | 2.49  | -0.11 | 3.30  |
| $\beta$ 2-AAb*Sector | sector1      | 1 | sector4 | 1 | -1.58 | 0.46 | -3.42 | 0.001  | 0.0026  | -2.49 | -0.66 | -3.31 | 0.16  |
| $\beta$ 2-AAb*Sector | sector2      | 1 | sector9 | 1 | 1.48  | 0.45 | 3.31  | 0.0014 | 0.0064  | 0.59  | 2.38  | -0.20 | 3.17  |
| $\beta$ 2-AAb*Sector | sector1<br>0 | 1 | sector9 | 1 | 0.86  | 0.26 | 3.27  | 0.0016 | 0.0082  | 0.34  | 1.39  | -0.13 | 1.86  |
| $\beta$ 2-AAb*Sector | sector1<br>2 | 1 | sector2 | 1 | -1.01 | 0.32 | -3.11 | 0.0026 | 0.00257 | -1.65 | -0.36 | -2.22 | 0.21  |
| $\beta$ 2-AAb*Sector | sector1<br>1 | 1 | sector2 | 1 | -0.97 | 0.34 | -2.85 | 0.0056 | 0.00187 | -1.65 | -0.29 | -2.26 | 0.31  |
| $\beta$ 2-AAb*Sector | sector2      | 1 | sector3 | 1 | -0.81 | 0.29 | -2.84 | 0.0057 | 0.00217 | -1.38 | -0.24 | -1.89 | 0.27  |
| $\beta$ 2-AAb*Sector | sector7      | 0 | sector9 | 0 | -3.79 | 1.46 | -2.6  | 0.0113 | 0.0023  | -6.70 | -0.88 | -9.30 | 1.72  |
| $\beta$ 2-AAb*Sector | sector1      | 1 | sector2 | 1 | -0.75 | 0.29 | -2.59 | 0.0115 | 0.0091  | -1.33 | -0.17 | -1.85 | 0.34  |
| $\beta$ 2-AAb*Sector | sector1<br>0 | 1 | sector8 | 1 | 0.97  | 0.38 | 2.54  | 0.0131 | 0.00437 | 0.21  | 1.73  | -0.47 | 2.41  |
| $\beta$ 2-AAb*Sector | sector7      | 1 | sector8 | 1 | 0.57  | 0.23 | 2.45  | 0.0165 | 0.0065  | 0.11  | 1.03  | -0.30 | 1.44  |

|                      |         |   |         |   |       |      |       |        |        |       |       |       |       |
|----------------------|---------|---|---------|---|-------|------|-------|--------|--------|-------|-------|-------|-------|
| $\beta$ 2-AAb*Sector | sector5 | 1 | sector8 | 1 | 0.76  | 0.31 | 2.41  | 0.0183 | 0.7342 | 0.13  | 1.38  | -0.43 | 1.94  |
| $\beta$ 2-AAb*Sector | sector2 | 1 | sector6 | 1 | 1.08  | 0.46 | 2.36  | 0.0209 | 0.7686 | 0.17  | 1.99  | -0.65 | 2.81  |
| $\beta$ 2-AAb*Sector | sector2 | 1 | sector4 | 1 | -0.82 | 0.37 | -2.25 | 0.0274 | 0.8327 | -1.55 | -0.09 | -2.21 | 0.56  |
| $\beta$ 2-AAb*Sector | sector2 | 1 | sector7 | 1 | 1.03  | 0.46 | 2.21  | 0.0299 | 0.852  | 0.10  | 1.95  | -0.72 | 2.78  |
| $\beta$ 2-AAb*Sector | sector7 | 0 | sector8 | 0 | -1.96 | 0.91 | -2.17 | 0.0333 | 0.8734 | -3.77 | -0.16 | -5.38 | 1.45  |
| $\beta$ 2-AAb*Sector | sector2 | 0 | sector7 | 0 | 3.82  | 1.82 | 2.09  | 0.0395 | 0.9044 | 0.19  | 7.45  | -3.06 | 10.69 |
| $\beta$ 2-AAb*Sector | sector2 | 0 | sector8 | 1 | 4.01  | 1.93 | 2.08  | 0.0411 | 0.9108 | 0.17  | 7.85  | -3.27 | 11.28 |
| $\beta$ 2-AAb*Sector | sector2 | 0 | sector9 | 1 | 3.90  | 1.94 | 2.01  | 0.0478 | 0.9333 | 0.04  | 7.76  | -3.41 | 11.21 |
| $\beta$ 2-AAb*Sector | sector2 | 1 | sector5 | 1 | 0.84  | 0.42 | 2     | 0.0491 | 0.9367 | 0.00  | 1.67  | -0.74 | 2.42  |
| $\beta$ 2-AAb*Sector | sector3 | 1 | sector8 | 1 | 2.41  | 0.39 | 6.18  | <.0001 | <.0001 | 1.63  | 3.18  | 0.94  | 3.88  |
| $\beta$ 2-AAb*Sector | sector3 | 1 | sector9 | 1 | 2.30  | 0.41 | 5.56  | <.0001 | <.0001 | 1.48  | 3.12  | 0.74  | 3.86  |
| $\beta$ 2-AAb*Sector | sector4 | 1 | sector5 | 1 | 1.66  | 0.25 | 6.66  | <.0001 | <.0001 | 1.17  | 2.16  | 0.72  | 2.60  |
| $\beta$ 2-AAb*Sector | sector4 | 1 | sector6 | 1 | 1.91  | 0.31 | 6.15  | <.0001 | <.0001 | 1.29  | 2.52  | 0.74  | 3.07  |
| $\beta$ 2-AAb*Sector | sector4 | 1 | sector7 | 1 | 1.85  | 0.33 | 5.56  | <.0001 | <.0001 | 1.19  | 2.52  | 0.60  | 3.11  |
| $\beta$ 2-AAb*Sector | sector4 | 1 | sector8 | 1 | 2.42  | 0.38 | 6.31  | <.0001 | <.0001 | 1.66  | 3.18  | 0.97  | 3.86  |
| $\beta$ 2-AAb*Sector | sector4 | 1 | sector9 | 1 | 2.31  | 0.41 | 5.63  | <.0001 | <.0001 | 1.49  | 3.13  | 0.76  | 3.86  |

\*\* interaction term  
significant p-value=0.037

| Differences of Least Squares Means (Sector*ETA-AAb) for Peripapillary region** |        |          |         |           |          |    |         |         |       |       |       |           |           |
|--------------------------------------------------------------------------------|--------|----------|---------|-----------|----------|----|---------|---------|-------|-------|-------|-----------|-----------|
| Effect                                                                         | Sector | ETA-AAb* | _Sector | _ETA-AAb* | Estimate | SE | t Value | Pr >  t | Adj P | Lower | Upper | Adj Lower | Adj Upper |

|                |         |   |         |   |        |      |       |        |        |     |      |        |        |
|----------------|---------|---|---------|---|--------|------|-------|--------|--------|-----|------|--------|--------|
| ETA-AAb        |         | 0 |         | 1 | -3.29  | 2.98 | -1.1  | 0.2734 | 0.2734 | -   | 2.65 | -9.24  | 19.265 |
| ETA-AAb*Sector | sector1 | 1 | sector4 | 1 | -10.38 | 3.05 | -3.4  | 0.0008 | 0.0177 | -   | 4.37 | -19.71 | -1.05  |
| ETA-AAb*Sector | sector1 | 0 | sector4 | 0 | -1.97  | 0.61 | -3.21 | 0.0015 | 0.0321 | -   | 0.76 | -3.85  | -0.09  |
| ETA-AAb*Sector | sector1 | 0 | sector4 | 1 | -10.68 | 3.54 | -3.02 | 0.0029 | 0.0565 | -   | 3.70 | -21.51 | 0.15   |
| ETA-AAb*Sector | sector1 | 0 | sector3 | 0 | -1.74  | 0.61 | -2.83 | 0.0051 | 0.093  | -   | 0.53 | -3.62  | 0.14   |
| ETA-AAb*Sector | sector3 | 0 | sector4 | 1 | -8.94  | 3.54 | -2.53 | 0.0122 | 0.1901 | -   | 1.97 | -19.78 | 1.89   |
| ETA-AAb*Sector | sector4 | 0 | sector4 | 1 | -8.71  | 3.54 | -2.46 | 0.0147 | 0.2186 | -   | 1.73 | -19.54 | 2.13   |
| ETA-AAb*Sector | sector2 | 1 | sector4 | 1 | -7.23  | 3.05 | -2.37 | 0.0185 | 0.2602 | -   | 1.23 | -16.56 | 2.10   |
| ETA-AAb*Sector | sector2 | 0 | sector4 | 1 | -7.63  | 3.54 | -2.16 | 0.0322 | 0.383  | -   | 0.65 | -18.47 | 3.20   |
| ETA-AAb*Sector | sector2 | 0 | sector3 | 0 | 1.31   | 0.61 | 2.13  | 0.0338 | 0.3958 | 0.1 | 2.52 | -0.57  | 3.19   |
| ETA-AAb*Sector | sector1 | 0 | sector2 | 0 | -3.05  | 0.61 | -4.96 | <.0001 | <.0001 | -   | 1.84 | -4.93  | -1.17  |

\*\* interaction term  
significant p-value=0.023

Supplementary Table S3a, b:

**All the significant GPCR-AAb values when the foveal avascular zone characteristics (FAZ) were introduced in the models.** We presented the: (a) Type 3 Tests of Fixed Effects for the interactions; (b) differences of the least square means (LS means) with estimates, standard error (SE), upper and lower confidence interval (CI) and adjusted upper and lower CI for the main effects.

Table S3a:

|                             | Type 3 Tests of Fixed Effects | F Value | Pr > F |
|-----------------------------|-------------------------------|---------|--------|
| SVP (covariate: FAZ of SVP) | FAZ of SVP*Noci-AAb           | 4.97    | 0.0287 |
| SVP (covariate: FAZ of SVP) | FAZ of SVP* $\alpha$ 1-AAb    | 22.53   | <.0001 |
| ICP (covariate: FAZ of SVP) | FAZ of SVP*Noci-AAb           | 9.12    | 0.0034 |
| ICP (covariate: FAZ of SVP) | FAZ of SVP* $\beta$ 2-AAb     | 9.74    | 0.0025 |
| ICP (covariate: FAZ of SVP) | FAZ of SVP* $\alpha$ 1-AAb    | 14.93   | 0.0002 |
| ICP (covariate: FAZ of SVP) | FAZ of SVP*M2-AAb             | 11.6    | 0.0011 |
| DCP (covariate: FAZ of SVP) | FAZ of SVP*Noci-AAb           | 7.58    | 0.0074 |

|                                              |                            |       |        |
|----------------------------------------------|----------------------------|-------|--------|
| DCP (covariate: FAZ of SVP)                  | FAZ of SVP* $\alpha$ 1-AAb | 8.74  | 0.0041 |
| Peripapillary region (covariate: FAZ of SVP) | FAZ of SVP*Noci-AAb        | 5.45  | 0.0225 |
| Peripapillary region (covariate: FAZ of SVP) | FAZ of SVP* $\beta$ 2-AAb  | 5.05  | 0.0277 |
| Peripapillary region (covariate: FAZ of SVP) | FAZ of SVP* $\alpha$ 1-AAb | 10.75 | 0.0016 |
| Peripapillary region (covariate: FAZ of SVP) | FAZ of SVP*M2-AAb          | 7.41  | 0.0082 |
| SVP (covariate: FAZ of ICP)                  | FAZ of ICP* $\alpha$ 1-AAb | 31.84 | <.0001 |
| ICP (covariate: FAZ of ICP)                  | FAZ of ICP* $\beta$ 2-AAb  | 8.96  | 0.0037 |
| ICP (covariate: FAZ of ICP)                  | FAZ of ICP* $\alpha$ 1-AAb | 24.82 | <.0001 |
| ICP (covariate: FAZ of ICP)                  | FAZ of ICP*M2-AAb          | 11.5  | 0.0011 |
| DCP (covariate: FAZ of ICP)                  | FAZ of ICP* $\alpha$ 1-AAb | 12.45 | 0.0007 |
| Peripapillary region (covariate: FAZ of ICP) | FAZ of ICP*Noci-AAb        | 8.32  | 0.0052 |
| Peripapillary region (covariate: FAZ of ICP) | FAZ of ICP* $\beta$ 2-AAb  | 5.21  | 0.0256 |
| Peripapillary region (covariate: FAZ of ICP) | FAZ of ICP* $\alpha$ 1-AAb | 21.13 | <.0001 |
| Peripapillary region (covariate: FAZ of ICP) | FAZ of ICP*M2-AAb          | 7.59  | 0.0075 |
| SVP (covariate: FAZ of DCP)                  | FAZ of DCP* $\alpha$ 1-AAb | 84.7  | <.0001 |
| ICP (covariate: FAZ of DCP)                  | FAZ of DCP* $\beta$ 2-AAb  | 4.59  | 0.0354 |
| ICP (covariate: FAZ of DCP)                  | FAZ of DCP* $\alpha$ 1-AAb | 67.75 | <.0001 |
| ICP (covariate: FAZ of DCP)                  | FAZ of DCP*M2-AAb          | 4.42  | 0.0389 |
| DCP (covariate: FAZ of DCP)                  | FAZ of DCP* $\alpha$ 1-AAb | 55.49 | <.0001 |
| Peripapillary region (covariate: FAZ of DCP) | FAZ of DCP* $\alpha$ 1-AAb | 26.77 | <.0001 |

Table S3b:

|                                                       | Differences of Least Squares Means |   |   |          |      |         |         |        |       |       |           |           |
|-------------------------------------------------------|------------------------------------|---|---|----------|------|---------|---------|--------|-------|-------|-----------|-----------|
| Covariates                                            | Effect                             |   |   | Estimate | SE   | t Value | Pr >  t | Adj P  | Lower | Upper | Adj Lower | Adj Upper |
| SVP<br>(covariate:<br>FAZ of SVP)                     | Noci-<br>AAb                       | 0 | 1 | 0.49     | 0.61 | 0.79    | 0.4306  | 0.4306 | -0.74 | 1.71  | -0.74     | 1.71      |
| SVP<br>(covariate:<br>FAZ of SVP)                     | $\alpha$ 1-<br>AAb                 | 0 | 1 | 2.53     | 0.69 | 3.70    | 0.0004  | 0.0004 | 1.17  | 3.90  | 1.17      | 3.90      |
| ICP (covariate:<br>FAZ of SVP)                        | Noci-<br>AAb                       | 0 | 1 | 0.15     | 0.57 | 0.26    | 0.7957  | 0.7957 | -0.99 | 1.28  | -0.99     | 1.28      |
| ICP (covariate:<br>FAZ of SVP)                        | $\beta$ 2-<br>AAb                  | 0 | 1 | 1.99     | 1.25 | 1.59    | 0.1152  | 0.1152 | -0.50 | 4.47  | -0.50     | 4.47      |
| ICP (covariate:<br>FAZ of SVP)                        | $\alpha$ 1-<br>AAb                 | 0 | 1 | 2.02     | 0.66 | 3.08    | 0.0029  | 0.0029 | 0.71  | 3.33  | 0.71      | 3.33      |
| ICP (covariate:<br>FAZ of SVP)                        | M2-<br>AAb                         | 0 | 1 | 3.04     | 1.26 | 2.41    | 0.0182  | 0.0182 | 0.53  | 5.55  | 0.53      | 5.55      |
| DCP<br>(covariate:<br>FAZ of SVP)                     | Noci-<br>AAb                       | 0 | 1 | 0.54     | 0.65 | 0.84    | 0.4061  | 0.4061 | -0.75 | 1.83  | -0.75     | 1.83      |
| DCP<br>(covariate:<br>FAZ of SVP)                     | $\alpha$ 1-<br>AAb                 | 0 | 1 | 2.23     | 0.79 | 2.83    | 0.006   | 0.006  | 0.66  | 3.80  | 0.66      | 3.80      |
| Peripapillary<br>region<br>(covariate:<br>FAZ of SVP) | Noci-<br>AAb                       | 0 | 1 | -1.46    | 1.05 | -1.39   | 0.1691  | 0.1691 | -3.55 | 0.63  | -3.55     | 0.63      |
| Peripapillary<br>region<br>(covariate:<br>FAZ of SVP) | $\beta$ 2-<br>AAb                  | 0 | 1 | 2.64     | 2.32 | 1.14    | 0.2595  | 0.2595 | -1.99 | 7.27  | -1.99     | 7.27      |
| Peripapillary<br>region<br>(covariate:<br>FAZ of SVP) | $\alpha$ 1-<br>AAb                 | 0 | 1 | 3.40     | 1.19 | 2.85    | 0.0057  | 0.0057 | 1.02  | 5.78  | 1.02      | 5.78      |
| Peripapillary<br>region<br>(covariate:<br>FAZ of SVP) | M2-<br>AAb                         | 0 | 1 | 5.04     | 2.34 | 2.16    | 0.0345  | 0.0345 | 0.38  | 9.71  | 0.38      | 9.71      |
| SVP<br>(covariate:<br>FAZ of ICP)                     | $\alpha$ 1-<br>AAb                 | 0 | 1 | 2.35     | 0.66 | 3.54    | 0.0007  | 0.0007 | 1.03  | 3.68  | 1.03      | 3.68      |
| ICP (covariate:<br>FAZ of ICP)                        | $\beta$ 2-<br>AAb                  | 0 | 1 | 0.87     | 1.06 | 0.83    | 0.4118  | 0.4118 | -1.23 | 2.97  | -1.23     | 2.97      |
| ICP (covariate:<br>FAZ of ICP)                        | $\alpha$ 1-<br>AAb                 | 0 | 1 | 1.87     | 0.61 | 3.05    | 0.0031  | 0.0031 | 0.65  | 3.10  | 0.65      | 3.10      |
| ICP (covariate:<br>FAZ of ICP)                        | M2-<br>AAb                         | 0 | 1 | 1.79     | 1.03 | 1.74    | 0.0851  | 0.0851 | -0.25 | 3.84  | -0.25     | 3.84      |
| DCP<br>(covariate:<br>FAZ of ICP)                     | $\alpha$ 1-<br>AAb                 | 0 | 1 | 2.07     | 0.75 | 2.77    | 0.007   | 0.007  | 0.58  | 3.55  | 0.58      | 3.55      |
| Peripapillary<br>region<br>(covariate:<br>FAZ of ICP) | Noci-<br>AAb                       | 0 | 1 | -0.85    | 1.08 | -0.78   | 0.4361  | 0.4361 | -3.01 | 1.31  | -3.01     | 1.31      |
| Peripapillary<br>region<br>(covariate:<br>FAZ of ICP) | $\beta$ 2-<br>AAb                  | 0 | 1 | 1.03     | 2.03 | 0.51    | 0.614   | 0.614  | -3.03 | 5.09  | -3.03     | 5.09      |
| Peripapillary<br>region                               | $\alpha$ 1-<br>AAb                 | 0 | 1 | 3.05     | 1.15 | 2.65    | 0.0099  | 0.0099 | 0.75  | 5.34  | 0.75      | 5.34      |

|                                                       |                    |   |   |       |      |      |        |        |       |       |       |       |
|-------------------------------------------------------|--------------------|---|---|-------|------|------|--------|--------|-------|-------|-------|-------|
| (covariate:<br>FAZ of ICP)                            |                    |   |   |       |      |      |        |        |       |       |       |       |
| Peripapillary<br>region<br>(covariate:<br>FAZ of ICP) | M2-<br>AAb         | 0 | 1 | 3.00  | 1.99 | 1.51 | 0.1352 | 0.1352 | -0.96 | 6.96  | -0.96 | 6.96  |
| SVP<br>(covariate:<br>FAZ of DCP)                     | $\alpha$ 1-<br>AAb | 0 | 1 | 9.22  | 0.93 | 9.93 | <.0001 | <.0001 | 7.37  | 11.07 | 7.37  | 11.07 |
| ICP (covariate:<br>FAZ of DCP)                        | $\beta$ 2-<br>AAb  | 0 | 1 | 1.76  | 1.21 | 1.45 | 0.151  | 0.151  | -0.66 | 4.18  | -0.66 | 4.18  |
| ICP (covariate:<br>FAZ of DCP)                        | $\alpha$ 1-<br>AAb | 0 | 1 | 7.67  | 0.88 | 8.75 | <.0001 | <.0001 | 5.92  | 9.41  | 5.92  | 9.41  |
| ICP (covariate:<br>FAZ of DCP)                        | M2-<br>AAb         | 0 | 1 | 2.67  | 1.19 | 2.25 | 0.0275 | 0.0275 | 0.30  | 5.04  | 0.30  | 5.04  |
| DCP<br>(covariate:<br>FAZ of DCP)                     | $\alpha$ 1-<br>AAb | 0 | 1 | 8.47  | 1.07 | 7.89 | <.0001 | <.0001 | 6.34  | 10.61 | 6.34  | 10.61 |
| Peripapillary<br>region<br>(covariate:<br>FAZ of DCP) | $\alpha$ 1-<br>AAb | 0 | 1 | 10.86 | 1.77 | 6.14 | <.0001 | <.0001 | 7.33  | 14.38 | 7.33  | 14.38 |
